# Supplementary material
Source: PubMed Central journal article supplement (PMC2866759)
Supplement: NIHMS181671-supplement-1.pdf [file NIHMS181671-supplement-1.pdf]

phosphorylated in the present manuscript; blue and green residues indicated  $\alpha$ -actinin-2 and calcineurin binding regions[3], respectively.

**Supplemental Figure 1. Additional spectra of phosphorylated peptides.** CID spectra used for detection of single phosphorylation at T-111 (A), S-106 (B) and S-116 (C), as well as for dual phosphorylation at S-106 and T-111 (D) are shown. ETD spectra for S-116 (E) is also provided. Bold labels indicate features used to resolve modified site.
