# Supplementary material
Source: PubMed Central journal article supplement (PMC2866759)
Supplement: NIHMS181671-supplement-01.pdf [file NIHMS181671-supplement-01.pdf]

### Supplemental Table: Proteins Identified in 2D Gels from Figure 3.

All proteins listed in this Table met the following identification criteria:  $\Delta\text{CN} > 0.1$ ; Xcorr versus charge state 2(+1), 3(+2), 4(+3) and 5(+4); and  $\geq 4$  peptides (except for the lower molecular weight cal sarcin-containing spots, which were with 3 peptides) with an upper molecular weight limit of 50kDa. Mouse IPI accession numbers are listed in parentheses after the protein name. No cal sarcin peptides were detected in spots 19-21 in the 2 or 4wk TAC hearts. For pI and MW, the observed values are outside, and the calculated (based on IPI sequence and ExPASy compute pI/MW tool) values inside, of parentheses.

| Spot # | SHAM (IPI accession)                               | Observed (Calculated) pI/MW | TAC 2wk (IPI accession)                                                     | Observed (Calculated) pI/MW                | TAC 4wk (IPI accession)                                                     | Observed (Calculated) pI/MW                |
|--------|----------------------------------------------------|-----------------------------|-----------------------------------------------------------------------------|--------------------------------------------|-----------------------------------------------------------------------------|--------------------------------------------|
| 1      | Pyruvate dehydrogenase E1 beta (IPI00132042)       | 6.2 (6.4)/ 35 (38.9)        | Tropomyosin alpha (IPI00123316)                                             | 6.2 (4.7)/ 35 (32.6)                       | None                                                                        | NA                                         |
| 2      | Four and a half LIM domains (IPI00118205)          | 6.6 (7.3)/ 35 (32.0)        | Four and a half LIM domains (IPI00118205)                                   | 6.6 (7.3)/ 35 (32.0)                       | Four and a half LIM domains (IPI00118205); Cal sarcin-1 (IPI00122334)       | 6.6 (7.3)/ 35 (32.0)                       |
| 3      | Four and a half LIM domains (IPI00118205)          | 6.7 (7.3)/ 35 (32.0)        | Cal sarcin-1 (IPI00122334); Four and a half LIM domains (IPI00118205)       | 6.7 (8.5)/ 35 (29.7); 6.7 (7.3)/ 35 (32.0) | Cal sarcin-1 (IPI00122334)                                                  | 6.7 (8.5)/ 35 (29.7)                       |
| 4      | Cal sarcin-1 (IPI00122334)                         | 7.2 (8.5)/ 37 (29.7)        | Cal sarcin-1 (IPI00122334)                                                  | 7.2 (8.5)/ 37 (29.7)                       | Cal sarcin-1 (IPI00122334)                                                  | 7.2 (8.5)/ 37 (29.7)                       |
| 5      | Cal sarcin-1 (IPI00122334)                         | 7.4 (8.5)/ 37 (29.7)        | Cal sarcin-1 (IPI00122334)                                                  | 7.4 (8.5)/ 37 (29.7)                       | Cal sarcin-1 (IPI00122334)                                                  | 7.4 (8.5)/ 37 (29.7)                       |
| 6      | Cal sarcin-1 (IPI00122334)                         | 7.6 (8.5)/ 37 (29.7)        | Cal sarcin-1 (IPI00122334)                                                  | 7.6 (8.5)/ 37 (29.7)                       | Cal sarcin-1 (IPI00122334)                                                  | 7.6 (8.5)/ 37 (29.7)                       |
| 7      | Electron transfer flavoprotein alpha (IPI00116753) | 7.0 (8.6)/ 30 (35.0)        | Cal sarcin-1 (IPI00122334)                                                  | 7.0 (8.5)/ 30 (29.7)                       | None                                                                        | NA                                         |
| 8      | PDZ and LIM domain protein 1 (IPI00309768)         | 7.3 (6.4)/ 35 (35.7)        | Cal sarcin-1 (IPI00122334)                                                  | 7.3 (8.5)/ 35 (29.7)                       | Cal sarcin-1 (IPI00122334)                                                  | 7.4 (8.5)/ 35 (29.7)                       |
| 9      | Cal sarcin-1 (IPI00122334)                         | 7.5 (8.5)/ 35 (29.7)        | Cal sarcin-1 (IPI00122334)                                                  | 7.5 (8.5)/ 35 (29.7)                       | Cal sarcin-1 (IPI00122334)                                                  | 7.5 (8.5)/ 35 (29.7)                       |
| 10     | Four and a half LIM domains (IPI00118205)          | 7.8 (7.3)/ 35 (32.0)        | Cal sarcin-1 (IPI00122334)                                                  | 7.8 (8)/ 35 (29.7)                         | Cal sarcin-1 (IPI00122334)                                                  | 7.8 (8.5)/ 35 (29.7)                       |
| 11     | Voltage-dependent anion channel 2 (IPI00122547)    | 8.0 (7.4)/ 35 (31.7)        | Voltage-dependent anion channel 2 (IPI00122547); Cal sarcin-1 (IPI00122334) | 8.0 (7.4)/ 35 (31.7); 8.0 (8.5)/ 35 (29.7) | Voltage-dependent anion channel 2 (IPI00122547); Cal sarcin-1 (IPI00122334) | 8.0 (7.4)/ 35 (31.7); 8.0 (8.5)/ 35 (29.7) |
| 12     | None                                               | NA                          | None                                                                        | NA                                         | Voltage-dependent anion channel 2                                           | 7.5 (7.4)/ 32 (31.7)                       |

|           |                                                                                                                      |                                                                          |                                               |                      |                                        |                       |
|-----------|----------------------------------------------------------------------------------------------------------------------|--------------------------------------------------------------------------|-----------------------------------------------|----------------------|----------------------------------------|-----------------------|
|           |                                                                                                                      |                                                                          |                                               |                      | (IPI00122547)                          |                       |
| <b>13</b> | None                                                                                                                 | NA                                                                       | None                                          | NA                   | None                                   | NA                    |
| <b>14</b> | None                                                                                                                 | NA                                                                       | None                                          | NA                   | None                                   | NA                    |
| <b>15</b> | None                                                                                                                 | NA                                                                       | None                                          | NA                   | None                                   | NA                    |
| <b>16</b> | None                                                                                                                 | NA                                                                       | None                                          | NA                   | None                                   | NA                    |
| <b>17</b> | None                                                                                                                 | NA                                                                       | Myosin light chain 3 (IPI00133392)            | 6.8 (5.0)/ 25 (22.4) | None                                   | NA                    |
| <b>18</b> | None                                                                                                                 | NA                                                                       | None                                          | NA                   | None                                   | NA                    |
| <b>19</b> | Electron transfer flavoprotein alpha (IPI00116753); Cytochrome b-c1 complex (IPI00133240); Calsarcin-1 (IPI00122334) | 8.0 (8.62)/ 22 (35.0);<br>8.0 (8.92)/ 22 (29.3);<br>8.0 (8.5)/ 22 (29.7) | Myosin regulatory light chain 2 (IPI00555015) | 8.0 (4.9)/ 22 (18.9) | Cytochrome b-c1 complex (IPI00133240)  | 8.0 (8.92)/ 22 (29.3) |
| <b>20</b> | None                                                                                                                 | NA                                                                       | None                                          | NA                   | Cytochrome b-c1 complex (IPI00133240)  | 8.3 (8.92)/ 22 (29.3) |
| <b>21</b> | Alpha-crystallin B chain (IPI00138274); Myosin regulatory light chain 2 (IPI00555015); Calsarcin-1 (IPI00122334)     | 7.8 (6.8)/ 18 (20.1);<br>7.8 (4.9)/ 18 (18.9);<br>7.8 (8.5)/ 18 (29.7)   | Myosin regulatory light chain 2 (IPI00555015) | 7.8 (4.9)/ 18 (18.9) | Alpha-crystallin B chain (IPI00138274) | 7.8 (6.8)/ 18 (20.1)  |
