# Supplementary material
Source: PubMed Central journal article supplement (PMC2866759)

A.

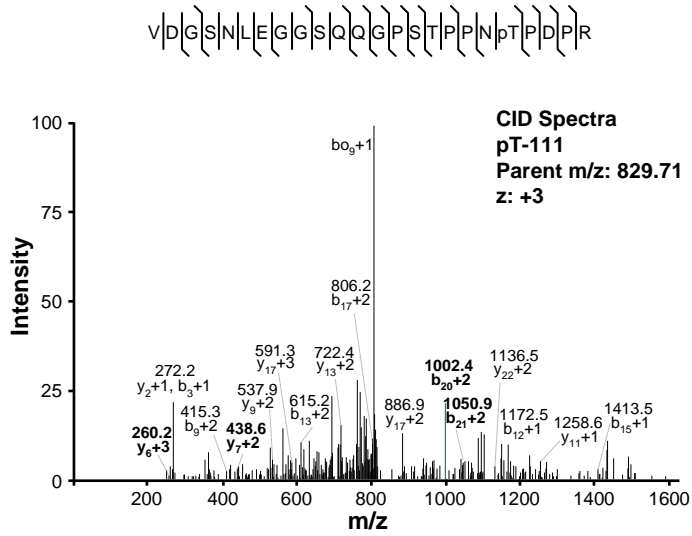

B.

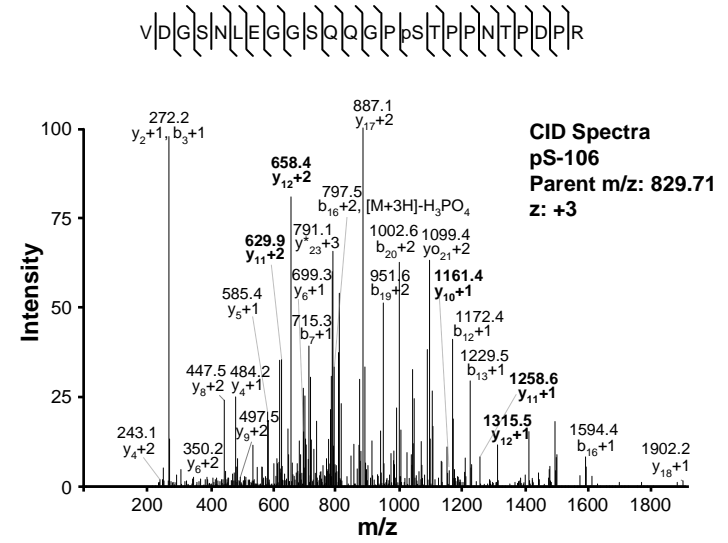

C.

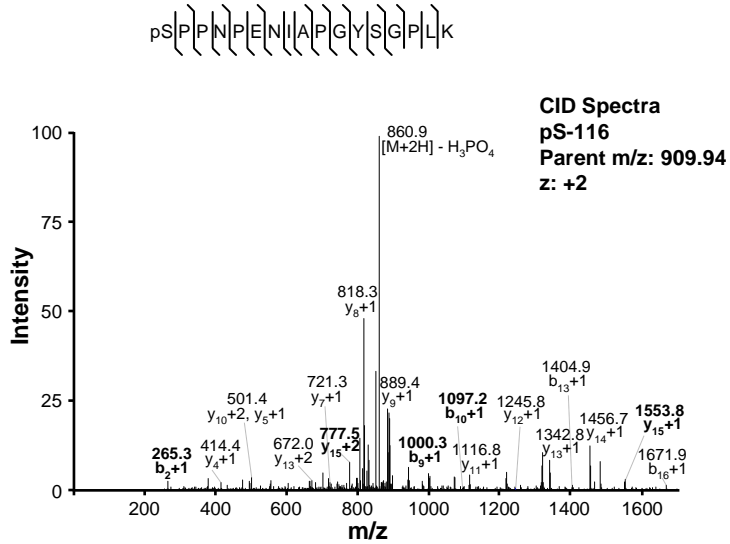

D.

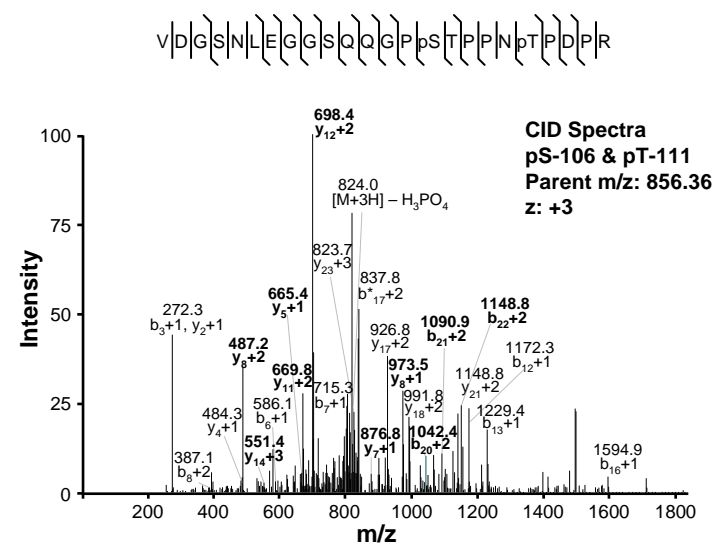

E.

pS|P|P|N|P|E|N|A|P|G|Y|S|G|P|L|K

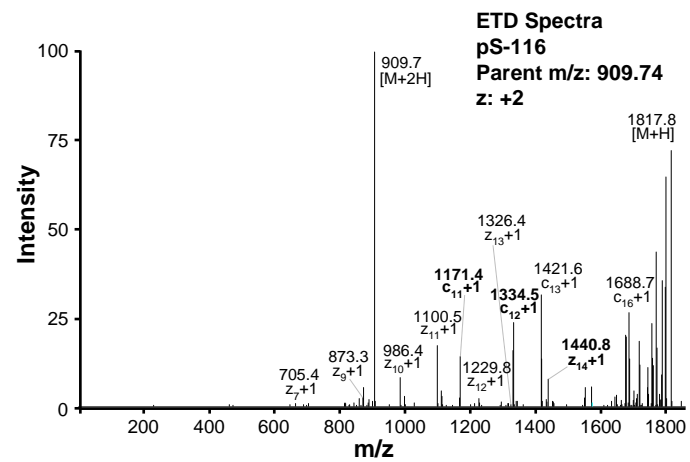

Supplement: NIHMS181671-supplement-02.pdf [file NIHMS181671-supplement-02.pdf]
